# Supplementary material for: Purification and In Vitro Activity of Mitochondria Targeted Nitrogenase Cofactor Maturase NifB
Source: PubMed Central journal article supplement (PMC5601070; doi:10.3389/fpls.2017.01567), 2017-09-12
Supplement: Presentation_1.pdf [file Presentation_1.pdf]

*Supplementary Material*

**Purification and in vitro activity of mitochondria targeted nitrogenase cofactor maturase NifB**

Stefan Burén, Xi Jiang, Gema Lopez-Torrejón, Carlos Echavarri-Erasun, and Luis M. Rubio\*

\* **Correspondence:** Luis M. Rubio: [lm.rubio@upm.es](mailto:lm.rubio@upm.es)

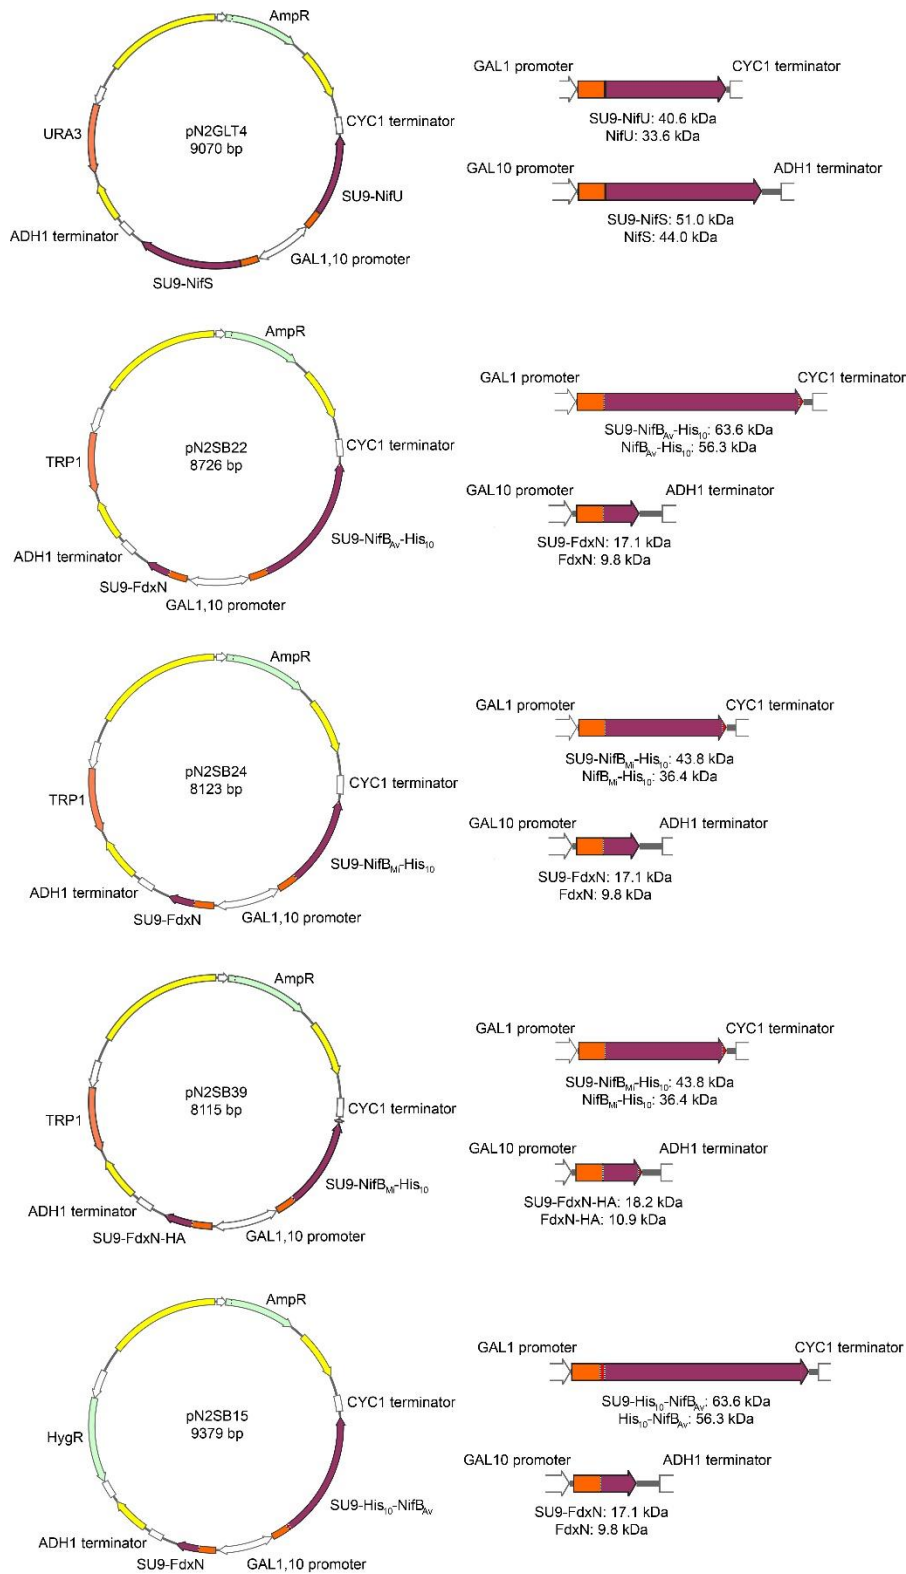

**SUPPLEMENTARY FIGURE 1. Yeast expression vectors.** Schematic overview of yeast expression vectors constructed in this study. See Supplementary Figure 2 for detailed information about the codon-optimized *nif* sequences.

SU9-NifU

1 M A S T R V L A S R L A S Q M  
1 ATGGCCTCCACTCGTGTCTCGCCTCTCGCCTGGCCTCCCAGATG

16 A A S A K V A R P A V R V A Q  
46 GCTGCTTCCGCCAAGGTTGCCCGCCCTGCTGTCCGCGTTGCTCAG

31 V S K R T I Q T G S P L Q T L  
91 GTCAGCAAGCGCACCATCCAGACTGGCTCCCCCTCCAGACCCTC

46 K R T Q M T S I V N A T T R Q  
136 AAGCGCACCCAGATGACCTCCATCGTCAACGCCACCACCCGCCAG

61 A F Q K R A Y S S R P W D Y S  
181 GCTTTCAGAAGCGCGCCTACTCTTCCAGGCCTTGGGACTACTCT

76 **E K V K E H F Y N P K N A G A**  
226 GAAAAGGTTAAGGAACATTTCTACAATCCAAAGAACGCCGGTGCT

91 **V E G A N A I G D V G S L S C**  
271 GTAGAAGGTGCAAACGCCATTGGTGACGTTGGTTCATTATCCTGT

106 **G D A L R L T L K V D P E T D**  
316 GGTGACGCTTTGAGATTAACATTGAAAGTTGACCCTGAAACCGAT

121 **V I L D A G F Q T F G C G S A**  
361 GTCATCTTGGACGCAGGTTTTCAAACCTTCGGTTGCGGTTCTGCT

136 **I A S S S A L T E M V K G L T**  
406 ATTGCATCTTCATCCGCTTTGACTGAAATGGTTAAGGGTTTGACA

151 **L D E A L K I S N Q D I A D Y**  
451 TTGGATGAAGCATTGAAAATCTCAAACCAAGATATCGCTGACTAT

166 **L D G L P P E K M H C S V M G**  
496 TTGGATGGTTTGCCACCTGAAAAGATGCATTGTTCCGTCATGGGT

181 **R E A L Q A A V A N Y R G E T**  
541 AGAGAAGCCTTACAAGCTGCAGTAGCTAACTACAGAGGTGAAACC

196 **I E D D H E E G A L I C K C F**  
586 ATTGAAGATGACCACGAAGAAGGTGCATTGATATGTAAATGCTTT

211 **A V D E V M V R D T I R A N K**  
631 GCCGTTGATGAAGTTATGGTCAGAGATAACCATAAGAGCAAATAAG

226 **L S T V E D V T N Y T K A G G**  
676 TTAAGTACTGTAGAAGATGTTACTAACTACACAAAAGCTGGTGGT

241 **G C S A C H E A I E R V L T E**  
 721 GGTGTCTCTGCTTGCCATGAAGCAATAGAAAGAGTTTTGACAGAA  
  
 256 **E L A A R G E V F V A A P I K**  
 766 GAATTGGCCGCTAGAGGTGAAGTATTCGTTGCAGCCCCAATTAAA  
  
 271 **A K K K V K V L A P E P A P A**  
 811 GCCAAAAGAAAGTCAAGGTATTGGCTCCAGAACCTGCCCCAGCT  
  
 286 **P V A E A P A A A P K L S N L**  
 856 CCTGTGCAGAAGCCCCAGCTGCAGCCCCTAAGTTGTCAAATTTG  
  
 301 **Q R I R R I E T V L A A I R P**  
 901 CAAAGAATTAGAAGAATCGAAACAGTCTTGGCTGCAATAAGACCT  
  
 316 **T L Q R D K G D V E L I D V D**  
 946 ACCTTGCAAAGAGACAAAGGTGACGTCGAATTAATTGATGTAGAC  
  
 331 **G K N V Y V K L T G A C T G C**  
 991 GGTAAAATGTTTACGTCAAATTGACCGGTGCTTGTACTGGTTGC  
  
 346 **Q M A S M T L G G I Q Q R L I**  
 1036 CAAATGGCATCCATGACATTAGGTGGTATACAACAAAGATTGATC  
  
 361 **E E L G E F V K V I P V S A A**  
 1081 GAAGAATTGGGTGAGTTCGTCAAAGTTATCCCAGTCTCCGCTGCC  
  
 376 **A H A Q M E V \***  
 1126 GCACACGCCCAAATGGAAGTCTGA

**SU9-Nifs**

1 M A S T R V L A S R L A S Q M  
 1 ATGGCCTCCACTCGTGTCTCGCCTCTCGCCTGGCCTCCCAGATG  
  
 16 A A S A K V A R P A V R V A Q  
 46 GCTGCTTCCGCCAAGGTTGCCCGCCCTGCTGTCCGCGTTGCTCAG  
  
 31 V S K R T I Q T G S P L Q T L  
 91 GTCAGCAAGCGCACCATCCAGACTGGCTCCCCCTCCAGACCCTC  
  
 46 K R T Q M T S I V N A T T R Q  
 136 AAGCGCACCCAGATGACCTCCATCGTCAACGCCACCACCCGCCAG  
  
 61 A F Q K R A Y S S R P A D V Y  
 181 GCTTTCAGAAAGCGCGCCTACTCTTCCAGGCCTGCCGACGTTTAC

76 **L D N N A T T R V D D E I V Q**  
 226 TTGGATAATAACGCTACTACAAGAGTCGATGACGAAATAGTACAA

91 **A M L P F F T E Q F G N P S S**  
 271 GCTATGTTGCCATTTTTTCACAGAACAATTCGGTAACCCTTCCAGT

106 **L H S F G N Q V G M A L K K A**  
 316 TTGCATTCCTTCGGTAACCAAGTTGGTATGGCCTTGAAGAAAGCT

121 **R Q S V Q K L L G A E H D S E**  
 361 AGACAATCTGTCCAAAAATTGTTAGGTGCAGAACACGATTCCGAA

136 **I V F T S C G T E S D S T A I**  
 406 ATCGTTTTTACCAGTTGTGGTACTGAATCTGACTCAACCGCCATT

151 **L S A L K A Q P E R K T V I T**  
 451 TTGTCTGCCTTAAAAGCTCAACCAGAAAGAAAGACTGTCATAACC

166 **T V V E H P A V L S L C D Y L**  
 496 ACTGTTGTGGAACATCCTGCAGTATTGTCTTTATGCGATTATTTG

181 **A S E G Y T V H K L P V D K K**  
 541 GCCTCAGAAGGTTACACTGTTTCATAAGTTACCAGTCGATAAAAAG

196 **G R L D L E H Y A S L L T D D**  
 586 GGTAGATTGGACTTAGAACACTATGCTTCCTTGTTAACAGATGAC

211 **V A V V S V M W A N N E T G T**  
 631 GTAGCTGTAGTTAGTGTATGTGGGCAAATAACGAAACTGGTACA

226 **L F P I E E M A R L A D D A G**  
 676 TTGTTTCCAATTGAAGAAATGGCAAGATTAGCCGATGACGCTGGT

241 **I M F H T D A V Q A V G K V P**  
 721 ATAATGTTCCATACTGATGCAGTACAAGCCGTTGGTAAAGTCCCT

256 **I D L K N S S I H M L S L S G**  
 766 ATAGACTTGAAGAACTCGTCAATCCACATGTTGTCCTTAAGTGGT

271 **H K L H A P K G V G V L Y L R**  
 811 CATAAATTGCACGCTCCAAAGGGTGTGGTGTCTTGTACTTAAGA

286 **R G T R F R P L L R G G H Q E**  
 856 AGAGGTACAAGATTCAGACCTTTGTTAAGAGGTGGTCATCAAGAA

301 **R G R R A G T E N A A S I I G**  
 901 AGAGGTAGAAGAGCCGGTACTGAAAATGCTGCATCTATTATAGGT

316 **L G V A A E R A L Q F M E H E**  
 946 TTGGGTGTTGCCGCTGAAAGAGCTTTACAATTCATGGAACATGAA  
  
 331 **N T E V K R L R D K L E A G I**  
 991 AACACTGAAGTTAAGAGATTGCGTGATAAGTTAGAAGCAGGTATT  
  
 346 **L A V V P H A F V T G D P D N**  
 1036 TTGGCCGTCGTACCACACGCATTTGTTACTGGTGACCCAGACAAT  
  
 361 **R L P N T A N I A F E Y I E G**  
 1081 AGATTACCTAACACAGCTAACATCGCATTTCGAATACATCGAAGGT  
  
 376 **E A I L L L L N K V G I A A S**  
 1126 GAAGCTATCTTGTGTTGTTGTTGAACAAAGTTGGTATAGCAGCCTCC  
  
 391 **S G S A C T S G S L E P S H V**  
 1171 AGTGGTTCTGCTTGTACATCTGGTTCATTGGAACCATCACATGTT  
  
 406 **M R A M D I P Y T A A H G T V**  
 1216 ATGAGAGCAATGGATATTCCTTATACAGCTGCACACGGTACTGTT  
  
 421 **R F S L S R Y T T E E E I D R**  
 1261 AGATTTTCTTTGAGTAGATACACAACCGAAGAAGAAATTGATAGA  
  
 436 **V I R E V P P I V A Q L R K L**  
 1306 GTCATTAGAGAAGTACCACCTATTGTTGCTCAATTGAGAAAATTG  
  
 451 **S P Y W S G N G P V E D P G K**  
 1351 TCTCCTTACTGGTCAGGTAATGGTCCTGTTGAAGACCCTGGTAAA  
  
 466 **A F A P V Y G \***  
 1396 GCCTTTGCTCCTGTCTATGGTTGA

SU9-FdxN

1 M A S T R V L A S R L A S Q M  
 1 ATGGCCTCCACTCGTGTCTCGCTCTCGCTGGCCTCCCAGATG  
  
 16 A A S A K V A R P A V R V A Q  
 46 GCTGCTTCCGCCAAGGTTGCCCGCCCTGCTGTCCGCGTTGCTCAG  
  
 31 V S K R T I Q T G S P L Q T L  
 91 GTCAGCAAGCGCACCATCCAGACTGGCTCCCCCTCCAGACCCTC  
  
 46 K R T Q M T S I V N A T T R Q  
 136 AAGCGCACCCAGATGACCTCCATCGTCAACGCCACCACCCGCCAG

61 A F Q K R A Y S S M A L K I V  
 181 GCTTTCAGAAAGCGCGCCTACTCTTCCATGGCTCTTAAGATAGTT  
  
 76 E S C V N C W A C V D V C P S  
 226 GAGTCTTGTGTGAACTGCTGGGCATGTGTTGATGTGTGCCCAAGT  
  
 91 E A I S L A G P H F E I S A S  
 271 GAGGCTATATCCTTGGCAGGTCCTCATTGAAATTTCTGCTTCA  
  
 106 K C T E C D G D Y A E K Q C A  
 316 AAATGCACCCGAGTGTGATGGAGACTATGCTGAAAAGCAATGCGCA  
  
 121 S I C P V E G A I L L A D G T  
 361 TCTATTTGTCCAGTTGAAGGTGCTATCTTGTTAGCAGACGGA  
  
 136 P A N P P G S L T G I P P E R  
 406 CCTGCTAACCACCTGGTTCCTTACAGGAATCCCACCTGAAAGA  
  
 151 L A E A M R E I Q A R \*  
 451 TTGGCTGAGGCAATGAGAGAAATACAGGCAAGGTAA

SU9-His10-NifB<sub>Av</sub>

1 M A S T R V L A S R L A S Q M  
 1 ATGGCCTCCACTCGTGTCTCGCCTCTCGCCTGGCCTCCCAGATG  
  
 16 A A S A K V A R P A V R V A Q  
 46 GCTGCTTCCGCCAAGGTTGCCCGCCCTGCTGTCCGCGTTGCTCAG  
  
 31 V S K R T I Q T G S P L Q T L  
 91 GTCAGCAAGCGCACCATCCAGACTGGCTCCCCCTCCAGACCCCTC  
  
 46 K R T Q M T S I V N A T T R Q  
 136 AAGCGCACCCAGATGACCTCCATCGTCAACGCCACCACCCGCCAG  
  
 61 A F Q K R A Y S S M H H H H H  
 181 GCTTTCAGAAAGCGCGCCTACTCTTCCATGCATCATCACCATCAC  
  
 76 H H H H H E L S V L G Q N N G  
 226 CATCACCATCACCATGAATTGTCTGTTTTGGGTCAAACAACGGT  
  
 91 G Q H S A G G C S S S S C G S  
 271 GGTCAACACTCTGCTGGTGGTTGTTCTTCTTCTTCTTGTGGTTCT  
  
 106 T H D Q L S H L P E N I R A K  
 316 ACTCACGACCAATTGTCTCACTTGCCAGAAAACATCAGAGCTAAG  
  
 121 V Q N H P C Y S E E A H H Y F  
 361 GTTCAAACCACCCATGTTACTCTGAAGAAGCTCACCACCTACTTC

136 A R M H V A V A P A C N I Q C  
 406 GCTAGAATGCACGTTGCTGTTGCTCCAGCTTGTAACATCCAATGT

151 H Y C N R K Y D C A N E S R P  
 451 CACTACTGTAACAGAAAGTACGACTGTGCTAACGAATCTAGACCA

166 G V V S E V L T P E Q A V K K  
 496 GGTGTTGTTTCTGAAGTTTTGACTCCAGAACAAGCTGTTAAGAAG

181 V K A V A A A I P Q M S V L G  
 541 GTTAAGGCTGTTGCTGCTGCTATCCCACAAATGTCTGTTTTGGGT

196 I A G P G D P L A N P K R T L  
 586 ATCGCTGGTCCAGGTGACCCATTGGCTAACCCAAAGAGAACTTTG

211 D T F R M L S E Q A P D I K L  
 631 GACACTTTCAGAATGTTGTCTGAACAAGCTCCAGACATCAAGTTG

226 C V S T N G L A L P E C V E E  
 676 TGTGTTTCTACTAACGGTTTGGCTTTGCCAGAATGTGTTGAAGAA

241 L A K H N I D H V T I T I N C  
 721 TTGGCTAAGCACAACATCGACCACGTTACTATCACTATCAACTGT

256 V D P E I G A K I Y P W I Y W  
 766 GTTGACCCAGAAATCGGTGCTAAGATCTACCCATGGATCTACTGG

271 N N K R I R G V K A A K I L I  
 811 AACAAACAAGAGAATCAGAGGTGTTAAGGCTGCTAAGATCTTGATC

286 E Q Q Q K G L E M L V A R G I  
 856 GAACAACAACAAAAGGGTTTGGAAATGTTGGTTGCTAGAGGTATC

301 L V K V N S V M I P G V N D E  
 901 TTGGTTAAGGTAACTCTGTTATGATCCCAGGTGTTAACGACGAA

316 H L K E V S K I V K A K G A F  
 946 CACTTGAAGGAAGTTTCTAAGATCGTTAAGGCTAAGGGTGCTTTTC

331 L H N V M P L I A E P E H G T  
 991 TTGCACAACGTTATGCCATTGATCGCTGAACCAGAACACGGTACT

346 F Y G V M G Q R S P E P E E L  
 1036 TTCTACGGTGTTATGGGTCAAAGATCTCCAGAACCAGAAGAATTG

361 Q D L Q D A C A G D M N M M R  
 1081 CAAGACTTGCAAGACGCTTGTGCTGGTGACATGAACATGATGAGA



376 H C R Q C R A D A V G M L G E  
 1126 CACTGTAGACAATGTAGAGCTGACGCTGTTGGTATGTTGGGTGAA  
  
 391 D R G D E F T L D K I E S M E  
 1171 GACAGAGGTGACGAATTCACCTTTGGACAAGATCGAATCTATGGAA  
  
 406 I D Y E A A M V K R A A I H A  
 1216 ATCGACTACGAAGCTGCTATGGTTAAGAGAGCTGCTATCCACGCT  
  
 421 A I K E E L D E K A A K K E R  
 1261 GCTATCAAGGAAGAATTGGACGAAAAGGCTGCTAAGAAGGAAAGA  
  
 436 L A G L S V A S V Q N G T S G  
 1306 TTGGCTGGTTTGTCTGTTGCTTCTGTTCAAAACGGTACTTCTGGT  
  
 451 R Y R P V L M A V A T S G G G  
 1351 AGATACAGACCAGTTTTGATGGCTGTTGCTACTTCTGGTGGTGGT  
  
 466 L I N Q H F G H A T E F L V Y  
 1396 TTGATCAACCAACACTTCGGTCACGCTACTGAATTCTTGGTTTAC  
  
 481 E A S P S G V R F I G H R R V  
 1441 GAAGCTTCTCCATCTGGTGTTAGATTCATCGGTCACAGAAGAGTT  
  
 496 D Q Y C V G N D T C G E K E S  
 1486 GACCAATACTGTGTTGGTAACGACACTTGTGGTGAAAAGGAATCT  
  
 511 A L A G S I R A L K G C E A V  
 1531 GCTTTGGCTGGTTCTATCAGAGCTTTGAAGGGTTGTGAAGCTGTT  
  
 526 L C S K I G F E P W S D L E T  
 1576 TTGTGTTCTAAGATCGGTTTCGAACCATGGTCTGACTTGAAACT  
  
 541 A G I Q P N G E H A M E P I E  
 1621 GCTGGTATCCAACCAAACGGTGAACACGCTATGGAACCAATCGAA  
  
 556 E A V M A V Y R E M I E S G R  
 1666 GAAGCTGTTATGGCTGTTTACAGAGAAATGATCGAATCTGGTAGA  
  
 571 L E N D G A L L Q A K A \*  
 1711 TTGGAAAACGACGGTGCTTTGTTGCAAGCTAAGGCTTAA

SU9-NifB<sub>Av</sub>-His<sub>10</sub>

1 M A S T R V L A S R L A S Q M  
 1 ATGGCCTCCACTCGTGTCCTCGCCTCTCGCCTGGCCTCCCAGATG

16 A A S A K V A R P A V R V A Q  
 46 GCTGCTTCCGCCAAGGTTGCCCGCCCTGCTGTCCGCGTTGCTCAG

31 V S K R T I Q T G S P L Q T L  
 91 GTCAGCAAGCGCACCATCCAGACTGGCTCCCCCTCCAGACCCCTC

46 K R T Q M T S I V N A T T R Q  
 136 AAGCGCACCCAGATGACCTCCATCGTCAACGCCACCACCCGCCAG

61 A F Q K R A Y S S M E L S V L  
 181 GCTTTCAGAAAGCGCGCCTACTCTTCCATGGAATTGTCTGTTTTG

76 **G Q N N G G Q H S A G G C S S**  
 226 GGTCAAACAACGGTGGTCAACACTCTGCTGGTGGTTGTTCTTCT

91 **S S C G S T H D Q L S H L P E**  
 271 TCTTCTTGTGGTTCTACTCACGACCAATTGTCTCACTTGCCAGAA

106 **N I R A K V Q N H P C Y S E E**  
 316 AACATCAGAGCTAAGGTTCAAACCACCCATGTTACTCTGAAGAA

121 **A H H Y F A R M H V A V A P A**  
 361 GCTCACCCTACTTCGCTAGAATGCACGTTGCTGTTGCTCCAGCT

136 **C N I Q C H Y C N R K Y D C A**  
 406 TGTAACATCCAATGTCCTACTGTAAACAGAAAGTACGACTGTGCT

151 **N E S R P G V V S E V L T P E**  
 451 AACGAATCTAGACCAGGTGTTGTTTCTGAAGTTTTGACTCCAGAA

166 **Q A V K K V K A V A A A I P Q**  
 496 CAAGCTGTTAAGAAGGTTAAGGCTGTTGCTGCTGCTATCCCACAA

181 **M S V L G I A G P G D P L A N**  
 541 ATGTCTGTTTTGGGTATCGCTGGTCCAGGTGACCCATTGGCTAAC

196 **P K R T L D T F R M L S E Q A**  
 586 CCAAAGAGAACTTTGGACACTTTCAGAATGTTGTCTGAACAAGCT

211 **P D I K L C V S T N G L A L P**  
 631 CCAGACATCAAGTTGTGTGTTTCTACTAACGGTTTGGCTTTGCCA

226 **E C V E E L A K H N I D H V T**  
 676 GAATGTGTTGAAGAATTGGCTAAGCACAACATCGACCACGTTACT

241 **I T I N C V D P E I G A K I Y**  
 721 ATCACTATCAACTGTGTTGACCCAGAAATCGGTGCTAAGATCTAC

256 **P W I Y W N N K R I R G V K A**  
 766 CCATGGATCTACTGGAACAACAAGAGAATCAGAGGTGTTAAGGCT

271 **A K I L I E Q Q Q K G L E M L**  
 811 GCTAAGATCTTGATCGAACAACAACAAAAGGGTTTGGAAATGTTG

286 **V A R G I L V K V N S V M I P**  
 856 GTTGCTAGAGGTATCTTGGTTAAGGTTAACTCTGTTATGATCCCA

301 **G V N D E H L K E V S K I V K**  
 901 GGTGTTAACGACGAACACTTGAAGGAAGTTTCTAAGATCGTTAAG

316 **A K G A F L H N V M P L I A E**  
 946 GCTAAGGGTGCTTTTCTTGCACAACGTTATGCCATTGATCGCTGAA

331 **P E H G T F Y G V M G Q R S P**  
 991 CCAGAACACGGTACTTTCTACGGTGTATGGGTCAAAGATCTCCA

346 **E P E E L Q D L Q D A C A G D**  
 1036 GAACCAGAAGAATTGCAAGACTTGCAAGACGCTTGTGCTGGTGAC

361 **M N M M R H C R Q C R A D A V**  
 1081 ATGAACATGATGAGACACTGTAGACAATGTAGAGCTGACGCTGTT

376 **G M L G E D R G D E F T L D K**  
 1126 GGTATGTTGGGTGAAGACAGAGGTGACGAATTCACCTTTGGACAAG

391 **I E S M E I D Y E A A M V K R**  
 1171 ATCGAATCTATGGAAATCGACTACGAAGCTGCTATGGTTAAGAGA

406 **A A I H A A I K E E L D E K A**  
 1216 GCTGCTATCCACGCTGCTATCAAGGAAGAATTGGACGAAAAGGCT

421 **A K K E R L A G L S V A S V Q**  
 1261 GCTAAGAAGGAAAGATTGGCTGGTTTGTCTGTTGCTTCTGTTCAA

436 **N G T S G R Y R P V L M A V A**  
 1306 AACGGTACTTCTGGTAGATACAGACCAGTTTTGATGGCTGTTGCT

451 **T S G G G L I N Q H F G H A T**  
 1351 ACTTCTGGTGGTGGTTTGTATCAACCAACACTTCGGTCACGCTACT

466 **E F L V Y E A S P S G V R F I**  
 1396 GAATTCTTGGTTTACGAAGCTTCTCCATCTGGTGTAGATTCATC

481 **G H R R V D Q Y C V G N D T C**  
 1441 GGTACAGAAGAGTTGACCAATACTGTGTTGGTAACGACACTTGT

496 **G E K E S A L A G S I R A L K**  
 1486 GGTGAAAAGGAATCTGCTTTGGCTGGTTCTATCAGAGCTTTGAAG  
  
 511 **G C E A V L C S K I G F E P W**  
 1531 GGTTGTGAAGCTGTTTTGTGTTCTAAGATCGGTTTCGAACCATGG  
  
 526 **S D L E T A G I Q P N G E H A**  
 1576 TCTGACTTGAAACTGCTGGTATCCAACCAAACGGTGAACACGCT  
  
 541 **M E P I E E A V M A V Y R E M**  
 1621 ATGGAACCAATCGAAGAAGCTGTTATGGCTGTTTACAGAGAAATG  
  
 556 **I E S G R L E N D G A L L Q A**  
 1666 ATCGAATCTGGTAGATTGGAAAACGACGGTGCTTTGTTGCAAGCT  
  
 571 **K A H H H H H H H H H \***  
 1711 AAGGCTCATCATCATCACCACCACCATCATCACCATTAA

SU9-NifB<sub>Mi</sub>-His<sub>10</sub>

1 M A S T R V L A S R L A S Q M  
 1 ATGGCCTCCACTCGTGTCTCGCTCTCGCTGGCCTCCCAGATG  
  
 16 A A S A K V A R P A V R V A Q  
 46 GCTGCTTCCGCCAAGGTTGCCCGCCCTGCTGTCCGCGTTGCTCAG  
  
 31 V S K R T I Q T G S P L Q T L  
 91 GTCAGCAAGCGCACCATCCAGACTGGCTCCCCCTCCAGACCCTC  
  
 46 K R T Q M T S I V N A T T R Q  
 136 AAGCGCACCCAGATGACCTCCATCGTCAACGCCACCACCCGCCAG  
  
 61 A F Q K R A Y S S M E K M S K  
 181 GCTTTCAGAAAGCGCGCCTACTCTTCCATGGAGAAAATGTCTAAA  
  
 76 **F S H L L K A H P C F N E K V**  
 226 TTTTCTCATTGCTTAAGGCTCACCCATGTTTCAACGAAAAGGTT  
  
 91 **H D K Y G R V H L P V A P R C**  
 271 CATGATAAGTATGGTAGAGTTCACTTGCCAGTGGCTCCTAGGTGC  
  
 106 **N I A C K F C K R S V S K E C**  
 316 AACATCGCATGTAAATTTTGCAAGAGATCTGTTTCAAAGGAATGT  
  
 121 **C E H R P G V S L G V L K P E**  
 361 TGCGAGCATAGGCCAGGTGTTAGTTTGGGAGTGTTAAAGCCTGAA

136 **D V E D Y L K K I L K E M P N**  
406 GATGTGGAGGACTATTTGAAGAAAATTCTTAAGGAAATGCCAAAT

151 **I K V V G I A G P G D S L F N**  
451 ATTAAGGTTGTGGGTATCGCTGGTCCTGGAGATTCCTTGTTTAAT

166 **K E T F E T L K I I D E K F P**  
496 AAGGAGACTTTTCGAGACACTTAAAATTATCGACGAAAAGTTCCCA

181 **N L I K C I S T N G L L L S K**  
541 AATCTTATTAAGTGTATCTCTACAAACGGACTTTTGCTTTCAAAA

196 **Y Y K D L A N L N V R T I T V**  
586 TATTACAAGGATCTTGCTAATTTGAACGTTAGAACTATCACAGTT

211 **T V N A I K P E I L E K I V D**  
631 ACCGTGAATGCAATTAACCTGAAATCTTGGAGAAGATAGTTGAT

226 **W V Y Y D K K L Y R G L E G A**  
676 TGGGTGTACTACGACAAAAGTTGTACAGAGGTCTTGAAGGAGCT

241 **K L L I E K Q I E G I K K A S**  
721 AAGCTTTTTGATCGAAAAGCAAATCGAGGGAATTA AAAAGGCTAGT

256 **E E D F I I K I N T V L I P E**  
766 GAAGAGGATTTTCATAATTA AAAATCAATACCGTTCTTATCCCTGAG

271 **I N M D H V V E I A K F F K D**  
811 ATAAACATGGATCACGTTGTGGAAATCGCTAAGTTTTTCAAGGAC

286 **Y A Y V Q N I I P L I P Q Y K**  
856 TACGCATACGTTCAAACATCATAACCATTGATCCCTCAGTATAAG

301 **M K E L R A P T C E E I K K V**  
901 ATGAAAGA ACTTAGAGCTCCA ACTTGTGAAGAAATTAAGAAAGTT

316 **R K E C E K Y I P Q F R A C G**  
946 AGAAAGGAATGCGAGAAGTACATTCCTCAATTCAGAGCATGTGGA

331 **Q C R A D A V G L I K E K E L**  
991 CAGTGCAGGGCTGATGCAGTGGGATTGATTAAAGAAAAGGAGCTT

346 **L K E F F K E K N K E K N I K**  
1036 CTTAAGGAATTTTTCAAGGAAAAGAATAAGGAAAAGAACATCAAA

361 **L E V F D L K H F S H H H H H**  
1081 CTTGAAGTTTTTCGACTTGAAGCATTCTCACACCATCATCATCAC

376 H H H H H H \*  
 1126 CACCACCATCATCACCATTAA

SU9-FdxN-HA

1 M A S T R V L A S R L A S Q M  
 1 ATGGCCTCCACTCGTGTCCCTCGCCTCTCGCCTGGCCTCCCAGATG

16 A A S A K V A R P A V R V A Q  
 46 GCTGCTTCCGCCAAGGTTGCCCGCCCTGCTGTCCGCGTTGCTCAG

31 V S K R T I Q T G S P L Q T L  
 91 GTCAGCAAGCGCACCATCCAGACTGGCTCCCCCTCCAGACCCTC

46 K R T Q M T S I V N A T T R Q  
 136 AAGCGCACCCAGATGACCTCCATCGTCAACGCCACCACCCGCCAG

61 A F Q K R A Y S S M A L K I V  
 181 GCTTTCAGAAAGCGCGCCTACTCTTCCATGGCTCTTAAGATAGTT

76 **E S C V N C W A C V D V C P S**  
 226 GAGTCTTGTGTGAACTGCTGGGCATGTGTTGATGTGTGCCCAAGT

91 **E A I S L A G P H F E I S A S**  
 271 GAGGCTATATCCTTGGCAGGTCCTCATTTTTGAAATTTCTGCTTCA

106 **K C T E C D G D Y A E K Q C A**  
 316 AAATGCACCGAGTGTGATGGAGACTATGCTGAAAAGCAATGCGCA

121 **S I C P V E G A I L L A D G T**  
 361 TCTATTTGTCCAGTTGAAGGTGCTATCTTGTTAGCAGACGGA

136 **P A N P P G S L T G I P P E R**  
 406 CCTGCTAACCCACCTGGTTCACTTACAGGAATCCACCTGAAAGA

151 **L A E A M R E I Q A R Y P Y D**  
 451 TTGGCTGAGGCAATGAGAGAAATACAGGCAAGGTATCCATATGAT

166 V P D Y A \*  
 496 GTTCCAGATTATGCTTAA

**SUPPLEMENTARY FIGURE 2. Codon-optimized DNA sequences and translated protein sequences.** Sequences of the *nifU*, *nifS*, *fdxN*, and *nifB* genes and their corresponding proteins expressed from yeast expression vectors shown in Supplementary Figure 1. Amino acids highlighted in green were identified by N-terminal sequencing.

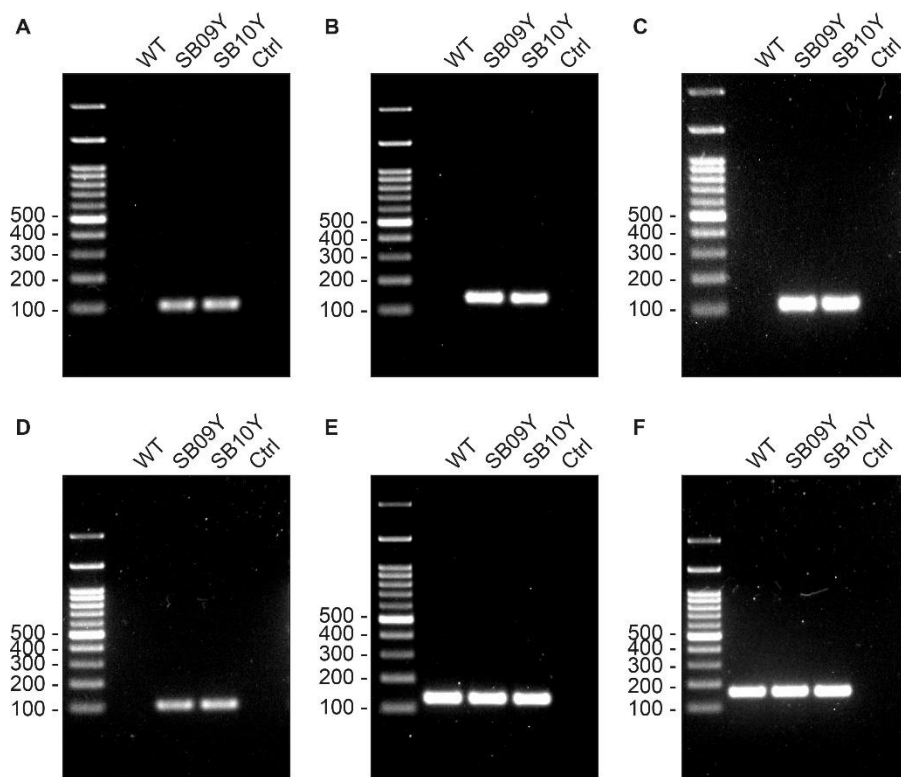

**G**

|           | WT   | SB09Y | SB10Y | Ctrl |
|-----------|------|-------|-------|------|
| fdxN (A)  | nd   | 17.1  | 16.3  | nd   |
| fdxN (C)  | nd   | 15.1  | 14.7  | nd   |
| rdn18 (E) | 8.4  | 8.0   | 7.3   | nd   |
| alg9 (F)  | 22.3 | 20.7  | 20.3  | nd   |

**SUPPLEMENTARY FIGURE 3. Detection of *fdxN* transcripts in yeast strains SB09Y and SB10Y.** (A-F) Reverse transcription polymerase chain reaction (RT-PCR) to detect *fdxN* transcripts in SB09Y and SB10Y using 4 distinct primer combinations. Primer sequences are detailed in Material and Methods. Expected amplicon sizes were: A, 105 bp; B, 144 bp; C, 110 bp, and D, 105 bp, respectively. Primers amplifying transcripts of *rdn18* (E, 133 bp) and *alg9* (F, 162 bp) were used as cDNA positive controls. PCR in absence of cDNA (Ctrl) was used as negative control in all cases. (G) Ct values obtained by real-time polymerase chain reaction (qPCR) using two primer combinations for *fdxN*, in addition to single primer combinations for *rdn18* and *alg9*. The letter within brackets indicate the RT-PCR primer combination used. Nd means not detected within 40 cycles of amplification.

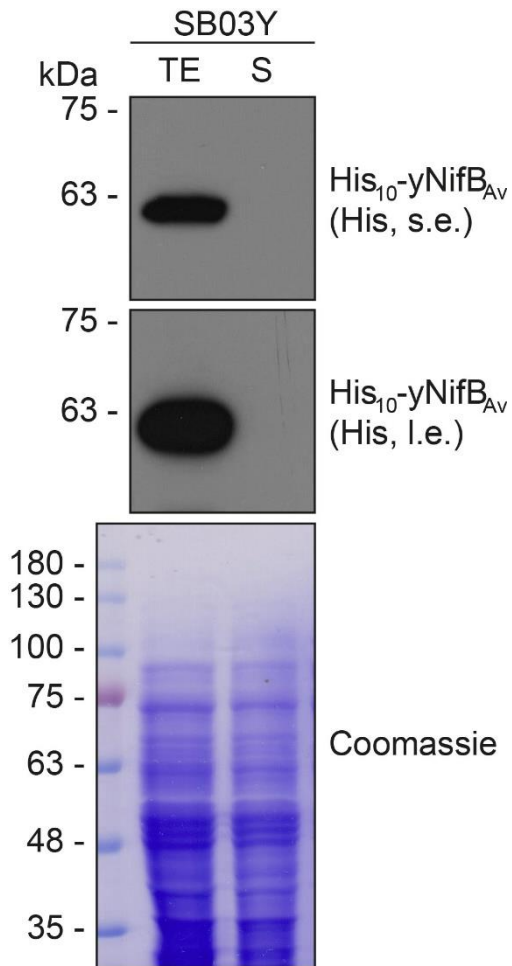

**SUPPLEMENTARY FIGURE 4. Solubility of N-terminally His-tagged NifB<sub>Av</sub> expressed in *S. cerevisiae*.** Western blot analysis of mitochondria targeted His<sub>10</sub>-NifB<sub>Av</sub> in total protein extracts (TE) and the soluble fraction (S) from SB03Y. Short (s.e.) and long (l.e.) exposures of the same membranes are shown. Coomassie stained SDS-PAGE (below) of the protein extracts is included as loading control.



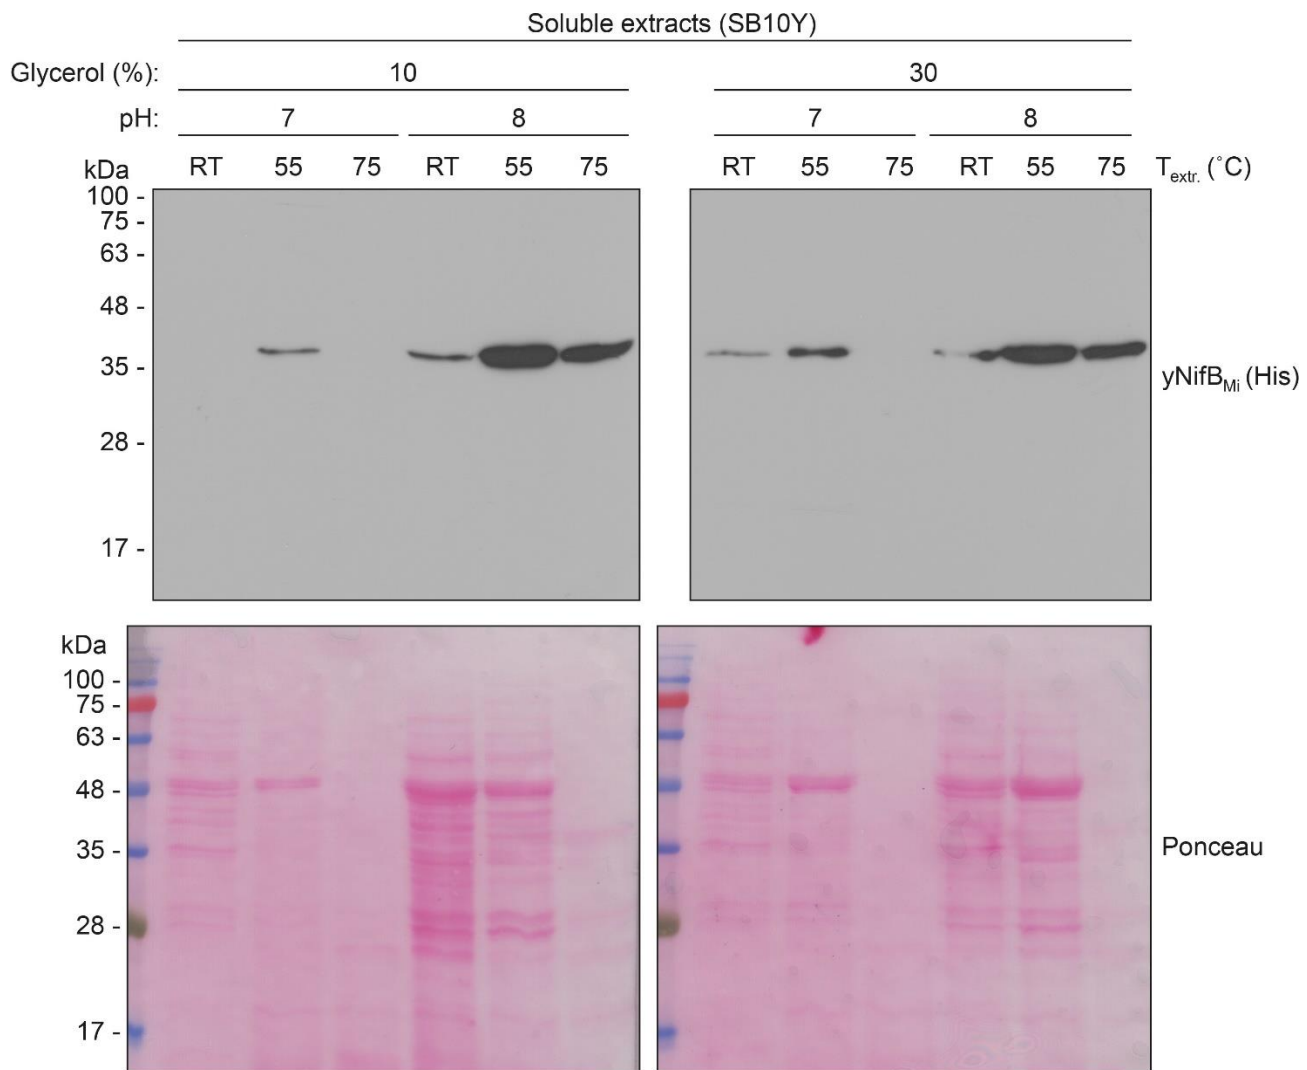

**SUPPLEMENTARY FIGURE 5. Levels of soluble yNifB<sub>Mi</sub> in SB10Y obtained by using 12 different extraction conditions.** Protein extracts were resolved by SDS-PAGE and then transferred to membranes for immunoblot analysis. Western blot membranes were exposed together on the same film. Ponceau stainings of the same membranes show the levels of total yeast proteins in each extracted sample.

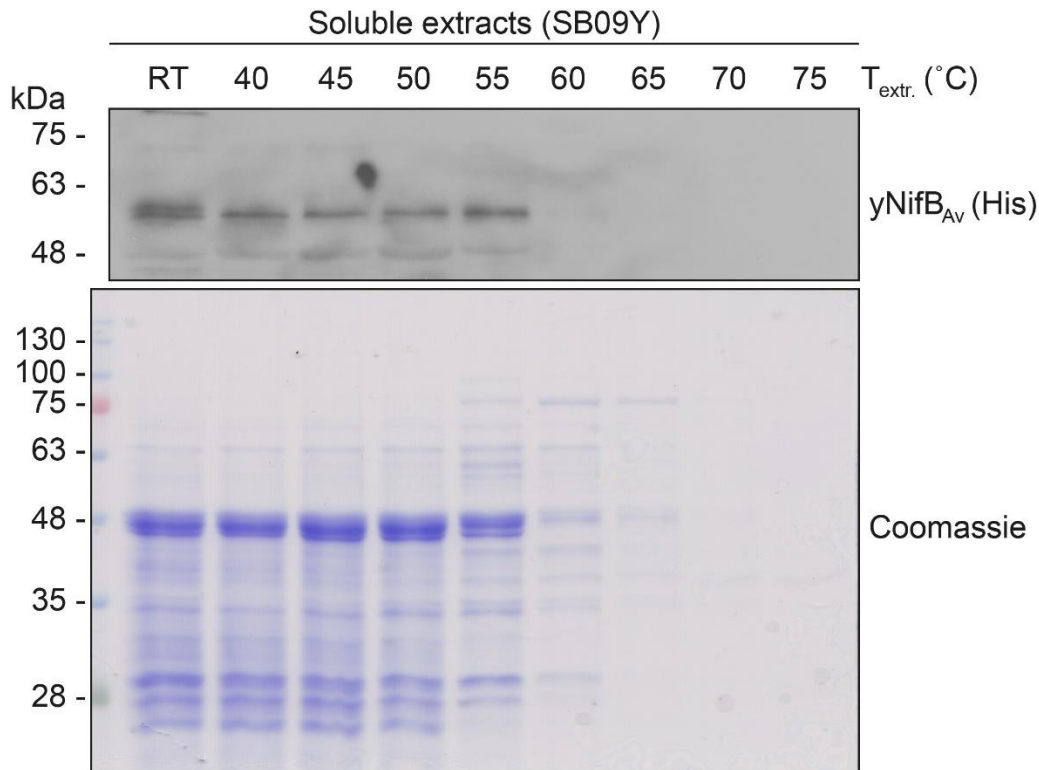

**SUPPLEMENTARY FIGURE 6. Levels of soluble yNifB<sub>Av</sub> upon heat-treatment of SB09Y extracts.** SDS-PAGE and Western blot analysis showing levels of soluble yNifB<sub>Av</sub> in SB09Y protein extracts upon heat-treatment at increasing temperatures. Heat-precipitation of yeast proteins at the different temperatures is shown using Coomassie stained SDS gels loaded with the treated extracts.

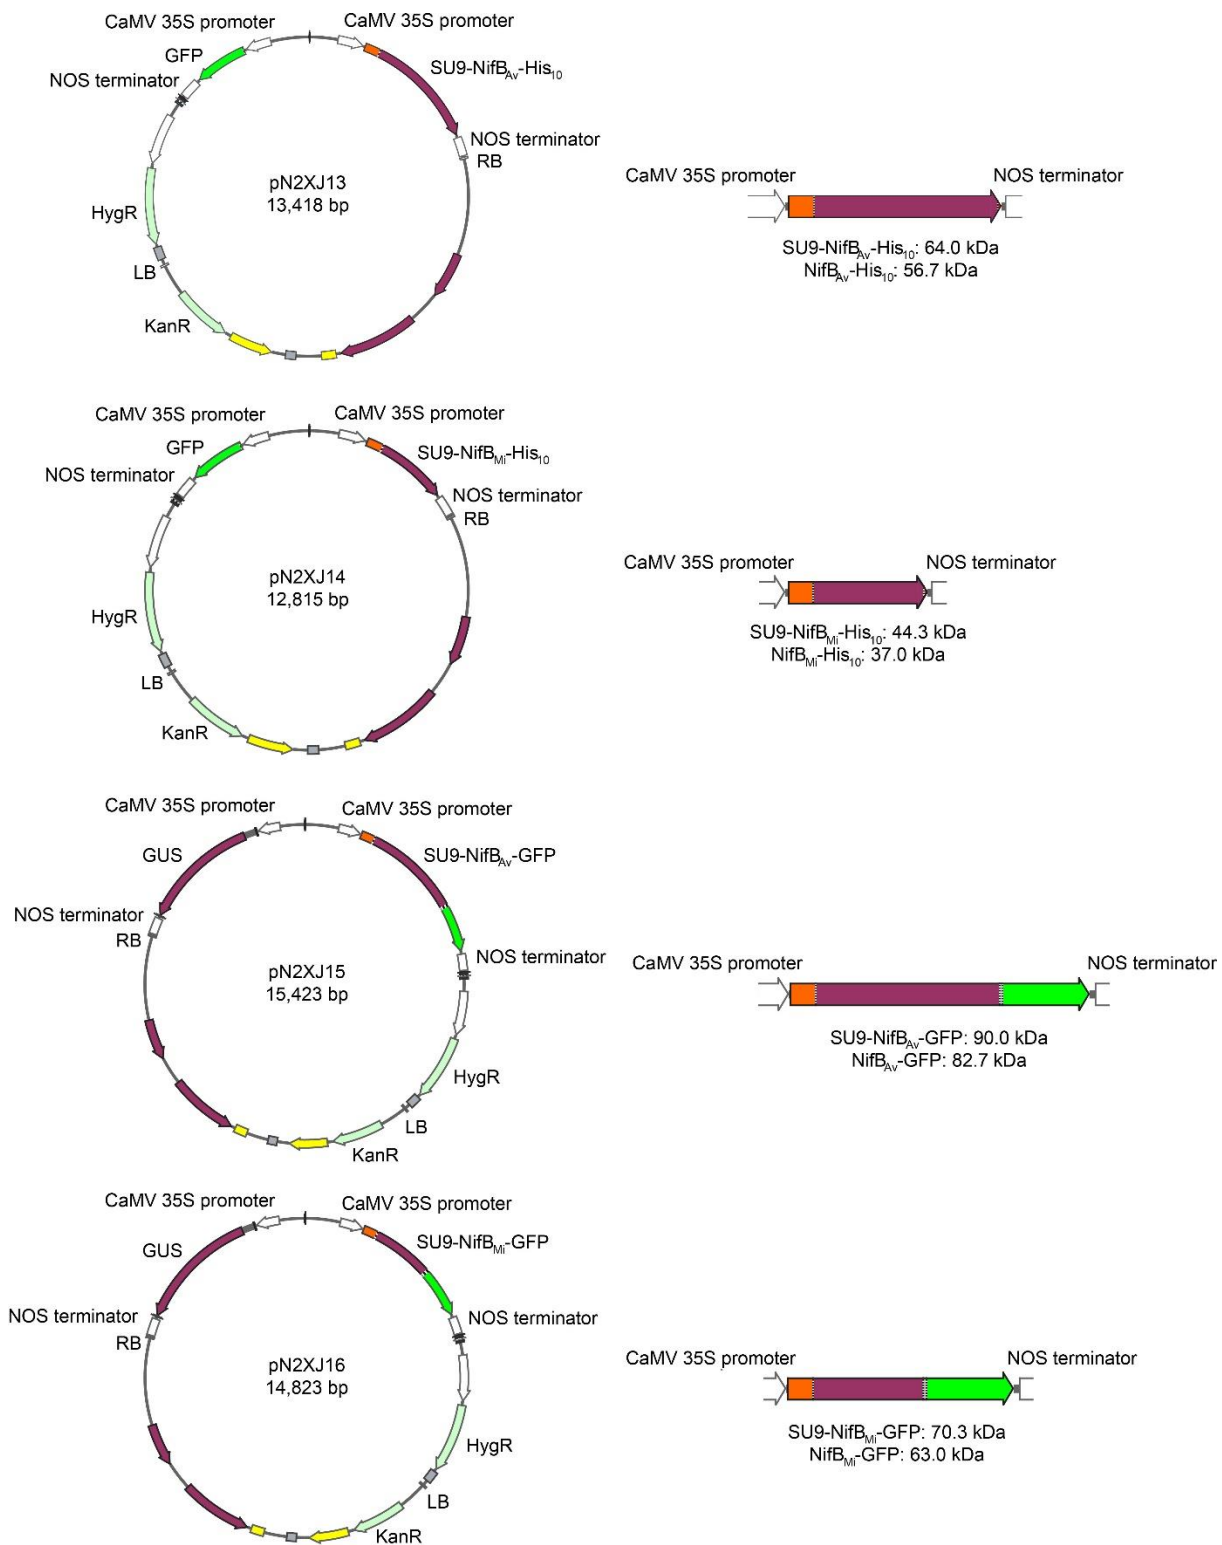

**SUPPLEMENTARY FIGURE 7. Plant expression vectors with SU9 leader sequence.** Schematic overview of plant expression vectors for expression of SU9-NifB<sub>Av</sub>-His<sub>10</sub>, SU9-NifB<sub>Mi</sub>-His<sub>10</sub>, SU9-NifB<sub>Av</sub>-GFP and SU9-NifB<sub>Mi</sub>-GFP. See Supplementary Figure 8 for detailed information about DNA and protein sequences.

SU9-NifB<sub>Av</sub>-His<sub>10</sub>

1 M V D P M A S T R V L A S R L  
 1 ATGGTAGATCCAATGGCCTCCACTCGTGTCTCGCCTCTCGCCTG

16 A S Q M A A S A K V A R P A V  
 46 GCCTCCAGATGGCTGCTTCCGCCAAGGTTGCCCGCCCTGCTGTC

31 R V A Q V S K R T I Q T G S P  
 91 CGCGTTGCTCAGGTCAGCAAGCGCACCATCCAGACTGGCTCCCC

46 L Q T L K R T Q M T S I V N A  
 136 CTCCAGACCCTCAAGCGCACCCAGATGACCTCCATCGTCAACGCC

61 T T R Q A F Q K R A Y S S M E  
 181 ACCACCCGCCAGGCTTTCAGAAAGCGCGCCTACTCTTCCATGGAA

76 L S V L G Q N N G G Q H S A G  
 226 TTGTCTGTTTTGGGTCAAACAACGGTGGTCAACACTCTGCTGGT

91 G C S S S S C G S T H D Q L S  
 271 GGTTGTTCTTCTTCTTCTTGTGGTTCTACTCACGACCAATTGTCT

106 H L P E N I R A K V Q N H P C  
 316 CACTTGCCAGAAAACATCAGAGCTAAGGTTCAAACCACCCATGT

121 Y S E E A H H Y F A R M H V A  
 361 TACTCTGAAGAAGCTCACCCTACTTCGCTAGAATGCACGTTGCT

136 V A P A C N I Q C H Y C N R K  
 406 GTTGCTCCAGCTTGTAACATCCAATGTCACTACTGTAACAGAAAG

151 Y D C A N E S R P G V V S E V  
 451 TACGACTGTGCTAACGAATCTAGACCAGGTGTTGTTTCTGAAGTT

166 L T P E Q A V K K V K A V A A  
 496 TTGACTCCAGAACAAGCTGTTAAGAAGGTTAAGGCTGTTGCTGCT

181 A I P Q M S V L G I A G P G D  
 541 GCTATCCACAAATGTCTGTTTTGGGTATCGCTGGTCCAGGTGAC

196 P L A N P K R T L D T F R M L  
 586 CCATTGGCTAACCCAAAGAGAAGTTTGGACTTTTCAGAATGTTG

211 S E Q A P D I K L C V S T N G  
 631 TCTGAACAAGCTCCAGACATCAAGTTGTGTGTTTCTACTAACGGT

226 L A L P E C V E E L A K H N I  
 676 TTGGCTTTGCCAGAATGTGTTGAAGAATTGGCTAAGCACAAACATC

241 **D H V T I T I N C V D P E I G**  
 721 GACCACGTTACTATCACTATCAACTGTGTTGACCCAGAAATCGGT

256 **A K I Y P W I Y W N N K R I R**  
 766 GCTAAGATCTACCCATGGATCTACTGGAACAACAAGAGAATCAGA

271 **G V K A A K I L I E Q Q Q K G**  
 811 GGTGTTAAGGCTGCTAAGATCTTGATCGAACAACAACAAAAGGGT

286 **L E M L V A R G I L V K V N S**  
 856 TTGGAAATGTTGGTTGCTAGAGGTATCTTGGTTAAGGTTAACTCT

301 **V M I P G V N D E H L K E V S**  
 901 GTTATGATCCCAGGTGTTAACGACGAACACTTGAAGGAAGTTTCT

316 **K I V K A K G A F L H N V M P**  
 946 AAGATCGTTAAGGCTAAGGGTGCTTTCTTGCACAACGTTATGCCA

331 **L I A E P E H G T F Y G V M G**  
 991 TTGATCGCTGAACCAGAACACGGTACTTTCTACGGTGTTATGGGT

346 **Q R S P E P E E L Q D L Q D A**  
 1036 CAAAGATCTCCAGAACCAGAAGAATTGCAAGACTTGCAAGACGCT

361 **C A G D M N M M R H C R Q C R**  
 1081 TGTGCTGGTGACATGAACATGATGAGACACTGTAGACAATGTAGA

376 **A D A V G M L G E D R G D E F**  
 1126 GCTGACGCTGTTGGTATGTTGGGTGAAGACAGAGGTGACGAATTC

391 **T L D K I E S M E I D Y E A A**  
 1171 ACTTTGGACAAGATCGAATCTATGGAAATCGACTACGAAGCTGCT

406 **M V K R A A I H A A I K E E L**  
 1216 ATGGTTAAGAGAGCTGCTATCCACGCTGCTATCAAGGAAGAATTG

421 **D E K A A K K E R L A G L S V**  
 1261 GACGAAAAGGCTGCTAAGAAGGAAAGATTGGCTGGTTTGTCTGTT

436 **A S V Q N G T S G R Y R P V L**  
 1306 GCTTCTGTTCAAACGGTACTTCTGGTAGATACAGACCAGTTTTG

451 **M A V A T S G G G L I N Q H F**  
 1351 ATGGCTGTTGCTACTTCTGGTGGTGGTTTGGATCAACCAACACTTC

466 **G H A T E F L V Y E A S P S G**  
 1396 GGTACGCTACTGAATTCTTGGTTTACGAAGCTTCTCCATCTGGT

481 **V R F I G H R R V D Q Y C V G**  
 1441 GTTAGATTCATCGGTCACAGAAGAGTTGACCAATACTGTGTTGGT  
  
 496 **N D T C G E K E S A L A G S I**  
 1486 AACGACACTTGTGGTGAAAAGGAATCTGCTTTGGCTGGTTCTATC  
  
 511 **R A L K G C E A V L C S K I G**  
 1531 AGAGCTTTGAAGGGTTGTGAAGCTGTTTTGTGTTCTAAGATCGGT  
  
 526 **F E P W S D L E T A G I Q P N**  
 1576 TTCGAACCATGGTCTGACTTGAAACTGCTGGTATCCAACCAAAC  
  
 541 **G E H A M E P I E E A V M A V**  
 1621 GGTGAACACGCTATGGAACCAATCGAAGAAGCTGTTATGGCTGTT  
  
 556 **Y R E M I E S G R L E N D G A**  
 1666 TACAGAGAAATGATCGAATCTGGTAGATTGGAAAACGACGGTGCT  
  
 571 **L L Q A K A H H H H H H H H H**  
 1711 TTGTTGCAAGCTAAGGCTCATCATCATCACCACCACCATCATCAC  
  
 586 H \*  
 1756 CATTAA

SU9-Ni<sub>5</sub>B<sub>3</sub>Mi-HiS<sub>10</sub>

1 M V D P M A S T R V L A S R L  
 1 ATGGTAGATCCAATGGCCTCCACTCGTGTCCCTCGCCTCTCGCCTG  
  
 16 A S Q M A A S A K V A R P A V  
 46 GCCTCCCAGATGGCTGCTTCCGCCAAGGTTGCCCGCCCTGCTGTC  
  
 31 R V A Q V S K R T I Q T G S P  
 91 CGCGTTGCTCAGGTCAGCAAGCGCACCATCCAGACTGGCTCCCC  
  
 46 L Q T L K R T Q M T S I V N A  
 136 CTCCAGACCCTCAAGCGCACCCAGATGACCTCCATCGTCAACGCC  
  
 61 T T R Q A F Q K R A Y S S M E  
 181 ACCACCCGCCAGGCTTTCCAGAAGCGCGCCTACTCTTCCATGGAG  
  
 76 **K M S K F S H L L K A H P C F**  
 226 AAAATGTCTAAATTTTCTCATTTGCTTAAGGCTCACCCATGTTTC  
  
 91 **N E K V H D K Y G R V H L P V**  
 271 AACGAAAAGGTTTCATGATAAGTATGGTAGAGTTCACTTGCCAGTG

106 **A P R C N I A C K F C K R S V**  
316 GCTCCTAGGTGCAACATCGCATGTAAATTTTGCAAGAGATCTGTT

121 **S K E C C E H R P G V S L G V**  
361 TCAAAGGAATGTTGCGAGCATAGGCCAGGTGTTAGTTTGGGAGTG

136 **L K P E D V E D Y L K K I L K**  
406 TTAAAGCCTGAAGATGTGGAGGACTATTTGAAGAAAATTCTTAAG

151 **E M P N I K V V G I A G P G D**  
451 GAAATGCCAAATATTAAGGTTGTGGGTATCGCTGGTCCTGGAGAT

166 **S L F N K E T F E T L K I I D**  
496 TCCTTGTTTAATAAGGAGACTTTCGAGACACTTAAAATTATCGAC

181 **E K F P N L I K C I S T N G L**  
541 GAAAAGTTCCCAAATCTTATTAAGTGTATCTCTACAAACGGACTT

196 **L L S K Y Y K D L A N L N V R**  
586 TTGCTTTCAAAATATTACAAGGATCTTGCTAATTTGAACGTTAGA

211 **T I T V T V N A I K P E I L E**  
631 ACTATCACAGTTACCGTGAATGCAATTAACCTGAAATCTTGGAG

226 **K I V D W V Y Y D K K L Y R G**  
676 AAGATAGTTGATTGGGTGTACTACGACAAAAGTTGTACAGAGGT

241 **L E G A K L L I E K Q I E G I**  
721 CTTGAAGGAGCTAAGCTTTTGATCGAAAAGCAAATCGAGGGAATT

256 **K K A S E E D F I I K I N T V**  
766 AAAAAGGCTAGTGAAGAGGATTTTCATAATTAATCAATACCGTT

271 **L I P E I N M D H V V E I A K**  
811 CTTATCCCTGAGATAAACATGGATCACGTTGTGGAAATCGCTAAG

286 **F F K D Y A Y V Q N I I P L I**  
856 TTTTTCAAGGACTACGCATACGTTCAAACATCATACCATTGATC

301 **P Q Y K M K E L R A P T C E E**  
901 CCTCAGTATAAGATGAAAGAACTTAGAGCTCCAACCTTGTGAAGAA

316 **I K K V R K E C E K Y I P Q F**  
946 ATTAAGAAAGTTAGAAAGGAATGCGAGAAGTACATTCCTCAATTC

331 **R A C G Q C R A D A V G L I K**  
991 AGAGCATGTGGACAGTGCAGGGCTGATGCAGTGGGATTGATTA

346 **E K E L L K E F F K E K N K E**  
 1036 GAAAAGGAGCTTCTTAAGGAATTTTCAAGGAAAAGAATAAGGAA  
  
 361 **K N I K L E V F D L K H F S H**  
 1081 AAGAACATCAAACCTTGAAGTTTTCGACTTGAAGCATTCTCACAC  
  
 376 H H H H H H H H H H \*  
 1126 CATCATCATCACCACCACCATCATCACCATTAA

SU9-NifB<sub>Av</sub>-GFP

1 M A S T R V L A S R L A S Q M  
 1 ATGGCCTCCACTCGTGTCTCGCCTCTCGCCTGGCCTCCCAGATG  
  
 16 A A S A K V A R P A V R V A Q  
 46 GCTGCTTCCGCCAAGGTTGCCCGCCCTGCTGTCCGCGTTGCTCAG  
  
 31 V S K R T I Q T G S P L Q T L  
 91 GTCAGCAAGCGCACCATCCAGACTGGCTCCCCCTCCAGACCCTC  
  
 46 K R T Q M T S I V N A T T R Q  
 136 AAGCGCACCCAGATGACCTCCATCGTCAACGCCACCACCCGCCAG  
  
 61 A F Q K R A Y S S M E L S V L  
 181 GCTTTCAGAAAGCGCGCCTACTCTTCCATGGAATTGTCTGTTTTG  
  
 76 **G Q N N G G Q H S A G G C S S**  
 226 GGTCAAACAACGGTGGTCAACACTCTGCTGGTGGTTGTTCTTCT  
  
 91 **S S C G S T H D Q L S H L P E**  
 271 TCTTCTTGTTGTTCTACTCACGACCAATTGTCTCACTTGCCAGAA  
  
 106 **N I R A K V Q N H P C Y S E E**  
 316 AACATCAGAGCTAAGGTTCAAACCACCCATGTTACTCTGAAGAA  
  
 121 **A H H Y F A R M H V A V A P A**  
 361 GCTCACCCTACTTCGCTAGAATGCACGTTGCTGTTGCTCCAGCT  
  
 136 **C N I Q C H Y C N R K Y D C A**  
 406 TGTAACATCCAATGTCCTACTGTAACAGAAAGTACGACTGTGCT  
  
 151 **N E S R P G V V S E V L T P E**  
 451 AACGAATCTAGACCAGGTGTTGTTTCTGAAGTTTTGACTCCAGAA  
  
 166 **Q A V K K V K A V A A A I P Q**  
 496 CAAGCTGTTAAGAAGGTTAAGGCTGTTGCTGCTGCTATCCCACAA



181 **M S V L G I A G P G D P L A N**  
541 ATGTCTGTTTTGGGTATCGCTGGTCCAGGTGACCCATTGGCTAAC

196 **P K R T L D T F R M L S E Q A**  
586 CCAAAGAGAACTTTGGACACTTTCAGAATGTTGTCTGAACAAGCT

211 **P D I K L C V S T N G L A L P**  
631 CCAGACATCAAGTTGTGTGTTTCTACTAACGGTTTGGCTTTGCCA

226 **E C V E E L A K H N I D H V T**  
676 GAATGTGTTGAAGAATTGGCTAAGCACAACATCGACCACGTTACT

241 **I T I N C V D P E I G A K I Y**  
721 ATCACTATCAACTGTGTTGACCCAGAAATCGGTGCTAAGATCTAC

256 **P W I Y W N N K R I R G V K A**  
766 CCATGGATCTACTGGAACAACAAGAGAATCAGAGGTGTTAAGGCT

271 **A K I L I E Q Q Q K G L E M L**  
811 GCTAAGATCTTGATCGAACAACAACAAAAGGGTTTGGAAATGTTG

286 **V A R G I L V K V N S V M I P**  
856 GTTGCTAGAGGTATCTTGGTTAAGGTTAACTCTGTTATGATCCCA

301 **G V N D E H L K E V S K I V K**  
901 GGTGTTAACGACGAACACTTGAAGGAAGTTTCTAAGATCGTTAAG

316 **A K G A F L H N V M P L I A E**  
946 GCTAAGGGTGCTTTTCTTGCACAACGTTATGCCATTGATCGCTGAA

331 **P E H G T F Y G V M G Q R S P**  
991 CCAGAACACGGTACTTTCTACGGTGTATGGGTCAAAGATCTCCA

346 **E P E E L Q D L Q D A C A G D**  
1036 GAACCAGAAGAATTGCAAGACTTGCAAGACGCTTGTGCTGGTGAC

361 **M N M M R H C R Q C R A D A V**  
1081 ATGAACATGATGAGACACTGTAGACAATGTAGAGCTGACGCTGTT

376 **G M L G E D R G D E F T L D K**  
1126 GGTATGTTGGGTGAAGACAGAGGTGACGAATTCACTTTGGACAAG

391 **I E S M E I D Y E A A M V K R**  
1171 ATCGAATCTATGGAAATCGACTACGAAGCTGCTATGGTTAAGAGA

406 **A A I H A A I K E E L D E K A**  
1216 GCTGCTATCCACGCTGCTATCAAGGAAGAATTGGACGAAAAGGCT

421 **A K K E R L A G L S V A S V Q**  
 1261 GCTAAGAAGGAAAGATTGGCTGGTTTGTCTGTTGCTTCTGTTCAA

436 **N G T S G R Y R P V L M A V A**  
 1306 AACGGTACTTCTGGTAGATACAGACCAGTTTTGATGGCTGTTGCT

451 **T S G G G L I N Q H F G H A T**  
 1351 ACTTCTGGTGGTGGTTTGTATCAACCAACACTTCGGTCACGCTACT

466 **E F L V Y E A S P S G V R F I**  
 1396 GAATTCTTGGTTTACGAAGCTTCTCCATCTGGTGTTAGATTCATC

481 **G H R R V D Q Y C V G N D T C**  
 1441 GGTCACAGAAGAGTTGACCAATACTGTGTTGGTAACGACACTTGT

496 **G E K E S A L A G S I R A L K**  
 1486 GGTGAAAAGGAATCTGCTTTGGCTGGTTCTATCAGAGCTTTGAAG

511 **G C E A V L C S K I G F E P W**  
 1531 GGTTGTGAAGCTGTTTTGTGTTCTAAGATCGGTTTCGAACCATGG

526 **S D L E T A G I Q P N G E H A**  
 1576 TCTGACTTGAAACTGCTGGTATCCAACCAAACGGTGAACACGCT

541 **M E P I E E A V M A V Y R E M**  
 1621 ATGGAACCAATCGAAGAAGCTGTTATGGCTGTTTACAGAGAAATG

556 **I E S G R L E N D G A L L Q A**  
 1666 ATCGAATCTGGTAGATTGGAAAACGACGGTGCTTTGTTGCAAGCT

571 **K A L E D Q F D P M V S K G E**  
 1711 AAGGCGCTAGAGGATCAATTCGATCCCATGGTGAGCAAGGGCGAG

586 **E L F T G V V P I L V E L D G**  
 1756 GAGCTGTTACCGGGGTGGTGCCCATCCTGGTCGAGCTGGACGGC

601 **D V N G H K F S V S G E G E G**  
 1801 GACGTAAACGGCCACAAGTTCAGCGTGTCCGGCGAGGGCGAGGGC

616 **D A T Y G K L T L K F I C T T**  
 1846 GATGCCACCTACGGCAAGCTGACCCTGAAGTTCATCTGCACCACC

631 **G K L P V P W P T L V T T F T**  
 1891 GGCAAGCTGCCCGTGCCCTGGCCCACCCTCGTGACCACCTTCACC

646 **Y G V Q C F S R Y P D H M K Q**  
 1936 TACGGCGTGCAGTGCTTCAGCCGCTACCCGACCACATGAAGCAG

661 H D F F K S A M P E G Y V Q E  
 1981 CACGACTTCTTCAAGTCCGCCATGCCCGAAGGCTACGTCCAGGAG  
  
 676 R T I F F K D D G N Y K T R A  
 2026 CGCACCATCTTCTTCAAGGACGACGGCAACTACAAGACCCGCGCC  
  
 691 E V K F E G D T L V N R I E L  
 2071 GAGGTGAAGTTCGAGGGCGACACCCTGGTGAACCGCATCGAGCTG  
  
 706 K G I D F K E D G N I L G H K  
 2116 AAGGGCATCGACTTCAAGGAGGACGGCAACATCCTGGGGCACAAG  
  
 721 L E Y N Y N S H N V Y I M A D  
 2161 CTGGAGTACAACACTACAACAGCCACAACGTCTATATCATGGCCGAC  
  
 736 K Q K N G I K V N F K I R H N  
 2206 AAGCAGAAGAACGGCATCAAGGTGAACTTCAAGATCCGCCACAAC  
  
 751 I E D G S V Q L A D H Y Q Q N  
 2251 ATCGAGGACGGCAGCGTGCAGCTCGCCGACCACTACCAGCAGAAC  
  
 766 T P I G D G P V L L P D N H Y  
 2296 ACCCCCATCGGCGACGGCCCCGTGCTGCTGCCCCGACAACCACTAC  
  
 781 L S T Q S A L S K D P N E K R  
 2341 CTGAGCACCCAGTCCGCCCTGAGCAAAGACCCCAACGAGAAGCGC  
  
 796 D H M V L L E F V T A A G I T  
 2386 GATCACATGGTCCTGCTGGAGTTCGTGACCGCCGCGGGATCACT  
  
 811 H G M D E L Y K \*  
 2431 CACGGCATGGACGAGCTGTACAAGTAA

SU9-Ni fB<sub>Mi</sub>-GFP

1 M A S T R V L A S R L A S Q M  
 1 ATGGCCTCCACTCGTGTCTCGCCTCTCGCCTGGCCTCCCAGATG  
  
 16 A A S A K V A R P A V R V A Q  
 46 GCTGCTTCCGCCAAGGTTGCCCGCCCTGCTGTCCGCGTTGCTCAG  
  
 31 V S K R T I Q T G S P L Q T L  
 91 GTCAGCAAGCGCACCATCCAGACTGGCTCCCCCTCCAGACCCTC  
  
 46 K R T Q M T S I V N A T T R Q  
 136 AAGCGCACCCAGATGACCTCCATCGTCAACGCCACCACCCGCCAG  
  
 61 A F Q K R A Y S S M E K M S K  
 181 GCTTTCCAGAAGCGCGCCTACTCTTCATGGAGAAAATGTCTAAA

76 **F S H L L K A H P C F N E K V**  
 226 TTTTCTCATTGCTTAAGGCTCACCCATGTTTCAACGAAAAGGTT

91 **H D K Y G R V H L P V A P R C**  
 271 CATGATAAGTATGGTAGAGTTCACCTGCCAGTGGCTCCTAGGTGC

106 **N I A C K F C K R S V S K E C**  
 316 AACATCGCATGTAAATTTTGCAAGAGATCTGTTTCAAAGGAATGT

121 **C E H R P G V S L G V L K P E**  
 361 TCGGAGCATAGGCCAGGTGTTAGTTTGGGAGTGTTAAAGCCTGAA

136 **D V E D Y L K K I L K E M P N**  
 406 GATGTGGAGGACTATTTGAAGAAAATTCTTAAGGAAATGCCAAAT

151 **I K V V G I A G P G D S L F N**  
 451 ATTAAGGTTGTGGGTATCGCTGGTCCTGGAGATTCCTTGTTAAT

166 **K E T F E T L K I I D E K F P**  
 496 AAGGAGACTTTCGAGACACTTAAAATTATCGACGAAAAGTCCCA

181 **N L I K C I S T N G L L L S K**  
 541 AATCTTATTAAGTGTATCTCTACAAACGGACTTTTGCTTTCAAAA

196 **Y Y K D L A N L N V R T I T V**  
 586 TATTACAAGGATCTTGCTAATTTGAACGTTAGAAGTATCACAGTT

211 **T V N A I K P E I L E K I V D**  
 631 ACCGTGAATGCAATTAACCTGAAATCTTGGAGAAGATAGTTGAT

226 **W V Y Y D K K L Y R G L E G A**  
 676 TGGGTGTACTACGACAAAAAGTTGTACAGAGGTCTTGAAGGAGCT

241 **K L L I E K Q I E G I K K A S**  
 721 AAGCTTTTGATCGAAAAGCAAATCGAGGGAATTA AAAAGGCTAGT

256 **E E D F I I K I N T V L I P E**  
 766 GAAGAGGATTCATAATTA AAAATCAATACCGTTCTTATCCCTGAG

271 **I N M D H V V E I A K F F K D**  
 811 ATAAACATGGATCACGTTGTGAAATCGCTAAGTTTTTCAAGGAC

286 **Y A Y V Q N I I P L I P Q Y K**  
 856 TACGCATACGTTCAAAAACATCATAACCATTGATCCCTCAGTATAAG

301 **M K E L R A P T C E E I K K V**  
 901 ATGAAAGAACTTAGAGCTCCAACCTTGTGAAGAAATTAAGAAAGTT

316 **R K E C E K Y I P Q F R A C G**  
 946 AGAAAGGAATGCGAGAAGTACATTCTCAATTCAGAGCATGTGGA

331 **Q C R A D A V G L I K E K E L**  
 991 CAGTGCAGGGCTGATGCAGTGGGATTGATTAAAGAAAAGGAGCTT

346 **L K E F F K E K N K E K N I K**  
 1036 CTTAAGGAATTTTTCAAGGAAAAGAATAAGGAAAAGAACATCAAA

361 **L E V F D L K H F S H A L E D**  
 1081 CTTGAAGTTTTCGACTTGAAGCATTCTCACACGCGCTAGAGGAT

376 Q F D P M V S K G E E L F T G  
 1126 CAATTCGATCCCATGGTGAGCAAGGGCGAGGAGCTGTTCCACGGG

391 V V P I L V E L D G D V N G H  
 1171 GTGGTGCCCATCCTGGTCGAGCTGGACGGCGACGTAAACGGCCAC

406 K F S V S G E G E G D A T Y G  
 1216 AAGTTCAGCGTGTCCGGCGAGGGCGAGGGCGATGCCACCTACGGC

421 K L T L K F I C T T G K L P V  
 1261 AAGCTGACCCTGAAGTTCATCTGCACCACCGGCAAGCTGCCCGTG

436 P W P T L V T T F T Y G V Q C  
 1306 CCCTGGCCCACCCTCGTGACCACCTTACCTACGGCGTGCAGTGC

451 F S R Y P D H M K Q H D F F K  
 1351 TTCAGCCGCTACCCCGACCACATGAAGCAGCACGACTTCTTCAAG

466 S A M P E G Y V Q E R T I F F  
 1396 TCCGCCATGCCCGAAGGCTACGTCCAGGAGCGCACCATCTTCTTC

481 K D D G N Y K T R A E V K F E  
 1441 AAGGACGACGGCAACTACAAGACCCGCGCCGAGGTGAAGTTCGAG

496 G D T L V N R I E L K G I D F  
 1486 GGCGACACCCTGGTGAACCGCATCGAGCTGAAGGGCATCGACTTC

511 K E D G N I L G H K L E Y N Y  
 1531 AAGGAGGACGGCAACATCCTGGGGCACAAGCTGGAGTACAACACTAC

526 N S H N V Y I M A D K Q K N G  
 1576 AACAGCCACAACGTCTATATCATGGCCGACAAGCAGAAGAACGGC

541 I K V N F K I R H N I E D G S  
 1621 ATCAAGGTGAACTTCAAGATCCGCCACAACATCGAGGACGGCAGC  
  
 556 V Q L A D H Y Q Q N T P I G D  
 1666 GTGCAGCTCGCCGACCACTACCAGCAGAACACCCCATCGGCGAC  
  
 571 G P V L L P D N H Y L S T Q S  
 1711 GGCCCCGTGCTGCTGCCCGACAACCACTACCTGAGCACCCAGTCC  
  
 586 A L S K D P N E K R D H M V L  
 1756 GCCCTGAGCAAAGACCCCAACGAGAAGCGCGATCACATGGTCCTG  
  
 601 L E F V T A A G I T H G M D E  
 1801 CTGGAGTTCGTGACCGCCCGGGATCACTCACGGCATGGACGAG  
  
 616 L Y K \*  
 1846 CTGTACAAGTAA

COX4-twinStrep-GFP

1 M L S L R Q S I R F F K P A T  
 1 ATGCTTTCACTTAGACAATCTATTAGATTTTTCAAGCCAGCTACA  
  
 16 R T L C S S R Y L L Q Q K P S  
 46 AGAACTTTGTGTTCTTCTAGATATCTTCTTCAGCAAAAACCTTCA  
  
 31 **A W S H P Q F E K G G G S G G**  
 91 GCATGGAGTCATCCTCAGTTTGAGAAAGGTGGAGGTTTCAGGTGGT  
  
 46 **G S G G S A W S H P Q F E K G**  
 136 GGAAGCGGTGGATCTGCTTGGTCACATCCACAATTTGAAAAAGGA  
  
 61 S M V S K G E E L F T G V V P  
 181 TCCATGGTGAGCAAGGGCGAGGAGCTGTTACCGGGGTGGTGCCC  
  
 76 I L V E L D G D V N G H K F S  
 226 ATCCTGGTCGAGCTGGACGGCGACGTAAACGGCCACAAGTTCAGC  
  
 91 V S G E G E G D A T Y G K L T  
 271 GTGTCCGGCGAGGGCGAGGGCGATGCCACCTACGGCAAGCTGACC  
  
 106 L K F I C T T G K L P V P W P  
 316 CTGAAGTTCATCTGCACCACGGCAAGCTGCCCCTGCCCTGGCCC  
  
 121 T L V T T F T Y G V Q C F S R  
 361 ACCCTCGTGACCACCTTCACCTACGGCGTGCAGTGCTTCAGCCGC

136 Y P D H M K Q H D F F K S A M  
 406 TACCCCGACCACATGAAGCAGCAGACTTCTTCAAGTCCGCCATG  
  
 151 P E G Y V Q E R T I F F K D D  
 451 CCCGAAGGCTACGTCCAGGAGCGCACCATCTTCTTCAAGGACGAC  
  
 166 G N Y K T R A E V K F E G D T  
 496 GGCAACTACAAGACCCGCGCCGAGGTGAAGTTCGAGGGCGACACC  
  
 181 L V N R I E L K G I D F K E D  
 541 CTGGTGAACCGCATCGAGCTGAAGGGCATCGACTTCAAGGAGGAC  
  
 196 G N I L G H K L E Y N Y N S H  
 586 GGCAACATCCTGGGGCACAAGCTGGAGTACAACACTACAACAGCCAC  
  
 211 N V Y I M A D K Q K N G I K V  
 631 AACGTCTATATCATGGCCGACAAGCAGAAGAACGGCATCAAGGTG  
  
 226 N F K I R H N I E D G S V Q L  
 676 AACTTCAAGATCCGCCACAACATCGAGGACGGCAGCGTGCAGCTC  
  
 241 A D H Y Q Q N T P I G D G P V  
 721 GCCGACCACTACCAGCAGAACACCCCATCGGGCGACGGCCCCGTG  
  
 256 L L P D N H Y L S T Q S A L S  
 766 CTGCTGCCCCGACAACCACTACCTGAGCACCCAGTCCGCCCTGAGC  
  
 271 K D P N E K R D H M V L L E F  
 811 AAAGACCCCAACGAGAAGCGCGATCACATGGTCCTGCTGGAGTTC  
  
 286 V T A A G I T H G M D E L Y K  
 856 GTGACCGCCCGGGATCACTCACGGCATGGACGAGCTGTACAAG  
  
 301 \*  
 901 TAA  
 901  
 901 ATT

COX4-twinStrep-NifB<sub>Av</sub>

1 M L S L R Q S I R F F K P A T  
 1 ATGCTTTCACTTAGACAATCTATTAGATTTTTCAAGCCAGCTACA  
  
 16 R T L C S S R Y L L Q Q K P S  
 46 AGAACTTTGTGTTCTTCTAGATATCTTCTTCAGCAAAAACCTTCA  
  
 31 **A W S H P Q F E K G G G S G G**  
 91 GCATGGAGTCATCCTCAGTTTGAGAAAGGTGGAGGTTTCAGGTGGT

46 **G S G G S A W S H P Q F E K G**  
 136 GGAAGCGGTGGATCTGCTTGGTCACATCCACAATTTGAAAAAGGA

61 S M E L S V L G Q N N G G Q H  
 181 TCCATGGAATTGTCTGTCTTGGGTCAAACAATGGTGGTCAACAT

76 S A G G C S S S S C G S T H D  
 226 TCTGCTGGTGGTTGTTCTTCTTCATCTTGTGGTTCTACTCAGCAT

91 Q L S H L P E N I R A K V Q N  
 271 CAATTGTCTCATTTGCCAGAAAACATTAGAGCCAAGGTTCAAAC

106 H P C Y S E E A H H Y F A R M  
 316 CATCCATGCTATTCTGAAGAAGCCCATCATTACTTTGCTAGAATG

121 H V A V A P A C N I Q C H Y C  
 361 CATGTTGCTGTTGCTCCAGCTTGTAACATTCAATGTCATTACTGC

136 N R K Y D C A N E S R P G V V  
 406 AACAGAAAGTACGATTGCGCTAATGAATCTAGACCAGGTGTTGTT

151 S E V L T P E Q A V K K V K A  
 451 TCTGAAGTCTTGACTCCAGAACAAGCTGTTAAGAAAGTTAAGGCT

166 V A A A I P Q M S V L G I A G  
 496 GTTGCTGCTGCTATTCCACAAATGTCTGTTTTAGGTATTGCTGGT

181 P G D P L A N P K R T L D T F  
 541 CCAGGTGATCCATTGGCTAATCCAAAAAGAACTTTGGACACTTTC

196 R M L S E Q A P D I K L C V S  
 586 AGGATGTTGTCTGAACAAGCTCCAGATATTAAGTTGTGCGTTTTCT

211 T N G L A L P E C V E E L A K  
 631 ACTAATGGTTTGGCCTTGCCAGAATGTGTTGAAGAATTGGCTAAG

226 H N I D H V T I T I N C V D P  
 676 CACAACATCGATCATGTTACCATTACCATCAACTGCGTTGATCCA

241 E I G A K I Y P W I Y W N N K  
 721 GAAATTGGTGCTAAAATCTACCCATGGATCTACTGGAACAACAAG

256 R I R G V K A A K I L I E Q Q  
 766 AGAATTAGAGGTGTTAAGGCCCAAGATTTTGATCGAACAACAA

271 Q K G L E M L V A R G I L V K  
 811 CAAAAGGCTTGAAATGTTGGTTGCCAGAGGTATTTTGGTTAAG



286 V N S V M I P G V N D E H L K  
856 GTTAACTCCGTTATGATCCCAGGTGTTAACGATGAACACTTGAAA

301 E V S K I V K A K G A F L H N  
901 GAAGTTTCCAAGATCGTTAAGGCTAAGGGTGCTTTCTTGCATAAT

316 V M P L I A E P E H G T F Y G  
946 GTTATGCCATTGATTGCCGAACCAGAACATGGTACTTTTTTATGGT

331 V M G Q R S P E P E E L Q D L  
991 GTTATGGGTCAGAGATCTCCAGAACCAGAAGAATTGCAAGACTTA

346 Q D A C A G D M N M M R H C R  
1036 CAAGATGCTTGTGCTGGTGATATGAATATGATGAGACATTGCAGA

361 Q C R A D A V G M L G E D R G  
1081 CAATGCAGAGCTGATGCTGTTGGTATGTTGGGTGAAGATAGAGGT

376 D E F T L D K I E S M E I D Y  
1126 GATGAATTCACCTTGGATAAGATCGAGTCCATGGAAATTGATTAC

391 E A A M V K R A A I H A A I K  
1171 GAAGCTGCTATGGTTAAGAGAGCTGCAATTCACGCTGCTATCAAA

406 E E L D E K A A K K E R L A G  
1216 GAAGAATTAGACGAAAAGGCTGCCAAGAAAGAAAGATTGGCTGGT

421 L S V A S V Q N G T S G R Y R  
1261 TTGTCTGTTGCCTCTGTTCAAATGGTACTTCTGGTAGATATAGG

436 P V L M A V A T S G G G L I N  
1306 CCAGTTTTGATGGCTGTTGCAACTTCAGGTGGTGGTTTTGATCAAT

451 Q H F G H A T E F L V Y E A S  
1351 CAACATTTTGGTCATGCTACCGAGTTCTTGGTTTATGAAGCTTCT

466 P S G V R F I G H R R V D Q Y  
1396 CCATCTGGTGTTAGATTCATCGGTCATAGAAGAGTTGATCAATAC

481 C V G N D T C G E K E S A L A  
1441 TGC GTTGGTAACGATACTGTGGTGAAAAAGAATCTGCTTTGGCA

496 G S I R A L K G C E A V L C S  
1486 GGTTCTATTAGAGCTTTGAAAGGTTGTGAAGCTGTCTTGTGTTCT

511 K I G F E P W S D L E T A G I  
1531 AAGATTGGTTTTCGAACCATGGTCTGATTTGGAAACTGCTGGTATT

526 Q P N G E H A M E P I E E A V  
 1576 CAACCTAACGGTGAACATGCTATGGAACCTATTGAAGAGGCTGTT  
  
 541 M A V Y R E M I E S G R L E N  
 1621 ATGGCTGTTTACAGAGAAATGATTGAATCCGGTAGATTGGAAAAC  
  
 556 D G A L L Q A K A \*  
 1666 GATGGTGCATTATTGCAAGCTAAGGCTTGA

COX4-twinStrep-NifB<sub>Mi</sub>

1 M L S L R Q S I R F F K P A T  
 1 ATGCTTTCACTTAGACAATCTATTAGATTTTTCAAGCCAGCTACA  
  
 16 R T L C S S R Y L L Q Q K P S  
 46 AGAACTTTGTGTTCTTCTAGATATCTTCTTCAGCAAAAACCTTCA  
  
 31 **A W S H P Q F E K G G G S G G**  
 91 GCATGGAGTCATCCTCAGTTTGAGAAAGGTGGAGGTTCAGGTGGT  
  
 46 **G S G G S A W S H P Q F E K G**  
 136 GGAAGCGGTGGATCTGCTTGGTCACATCCACAATTTGAAAAAGGA  
  
 61 S M E K M S K F S H L L K A H  
 181 TCCATGGAAAAGATGTCCAAGTTCTCCCATTTGTTGAAAGCTCAT  
  
 76 P C F N E K V H D K Y G R V H  
 226 CCATGCTTCAACGAAAAGGTTTCATGATAAGTACGGTAGAGTTCAT  
  
 91 L P V A P R C N I A C K F C K  
 271 TTGCCAGTTGCTCCAAGATGTAACATTGCTTGTAAGTTCTGCAAG  
  
 106 R S V S K E C C E H R P G V S  
 316 AGGTCCGTTTCTAAAGAATGTTGTGAACATAGACCAGGTGTTTCT  
  
 121 L G V L K P E D V E D Y L K K  
 361 TTGGGTGTTTTGAAACCAGAAGATGTTGAGGACTACCTGAAAAAG  
  
 136 I L K E M P N I K V V G I A G  
 406 ATCTTGAAAGAGATGCCAAACATCAAGGTTGTTGGTATTGCTGGT  
  
 151 P G D S L F N K E T F E T L K  
 451 CCTGGTGATTCTCTGTTTAAACAAAGAACTTTCGAAACCCTGAAG  
  
 166 I I D E K F P N L I K C I S T  
 496 ATCATCGACGAAAAGTTTCCCAACTTGATTAAGTGCATTTCCACC

181 N G L L L S K Y Y K D L A N L  
541 AACGGTCTGTTGTTGTCTAAGTACTACAAGGATTTGGCCAACTTG

196 N V R T I T V T V N A I K P E  
586 AACGTTAGAACTATTACCGTACTGTCAACGCCATTAAGCCAGAA

211 I L E K I V D W V Y Y D K K L  
631 ATCTTGAAAAAATCGTTGACTGGGTTTACTACGACAAGAAGTTG

226 Y R G L E G A K L L I E K Q I  
676 TATAGAGGTTTGGAAGGTGCCAAGTTGTTGATCGAAAAACAAATC

241 E G I K K A S E E D F I I K I  
721 GAAGGTATCAAGAAGGCCTCCGAAGAAGATTTTCATTATCAAGATC

256 N T V L I P E I N M D H V V E  
766 AACACCGTCTTGATCCAGAAATCAACATGGATCACGTTGTTGAA

271 I A K F F K D Y A Y V Q N I I  
811 ATTGCCAAGTTCTTCAAGGATTACGCCTACGTTCAAAACATCATT

286 P L I P Q Y K M K E L R A P T  
856 CCATTGATTCCACAGTACAAGATGAAGGAATTGAGAGCACCAACT

301 C E E I K K V R K E C E K Y I  
901 TGCGAAGAAATCAAAAAGGTCAGAAAAGAGTGCGAGAAGTACATC

316 P Q F R A C G Q C R A D A V G  
946 CCACAATTCAGAGCTTGTGGTCAATGTAGAGCTGATGCTGTTGGT

331 L I K E K E L L K E F F K E K  
991 CTGATCAAAGAAAAAGAGCTGTTGAAAGAGTTTTTCAAAGAGAAG

346 N K E K N I K L E V F D L K H  
1036 AACAAAGAAAAGAACATCAAGCTGGAAGTGTTCTCGACTTGAAGCAC

361 F S H \*  
1081 TTCTCTCATTGA

**SUPPLEMENTARY FIGURE 8. DNA and protein sequences of SU9 and COX4 mitochondria targeted NifB variants.** DNA and translated protein sequences of NifB variants targeted to the mitochondria of *N. benthamiana* using the SU9 or COX4 leader sequences from plant expression vectors shown in Supplementary Figure 7 and Supplementary Figure 10.

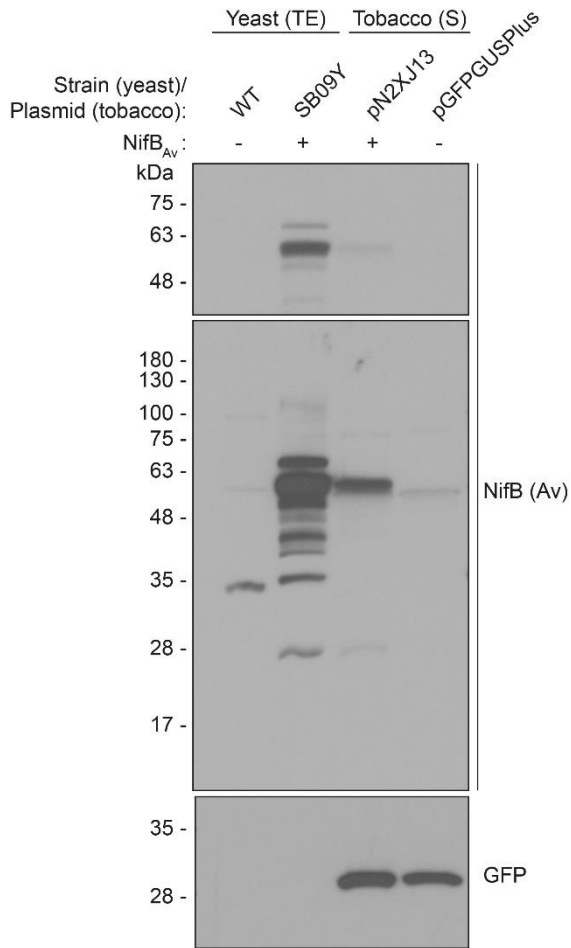

**SUPPLEMENTARY FIGURE 9. Expression and solubility of mitochondria targeted (SU9) NifB<sub>Av</sub> in *N. benthamiana* leaves.** Full-size image of cropped exposure in Figure 6B.

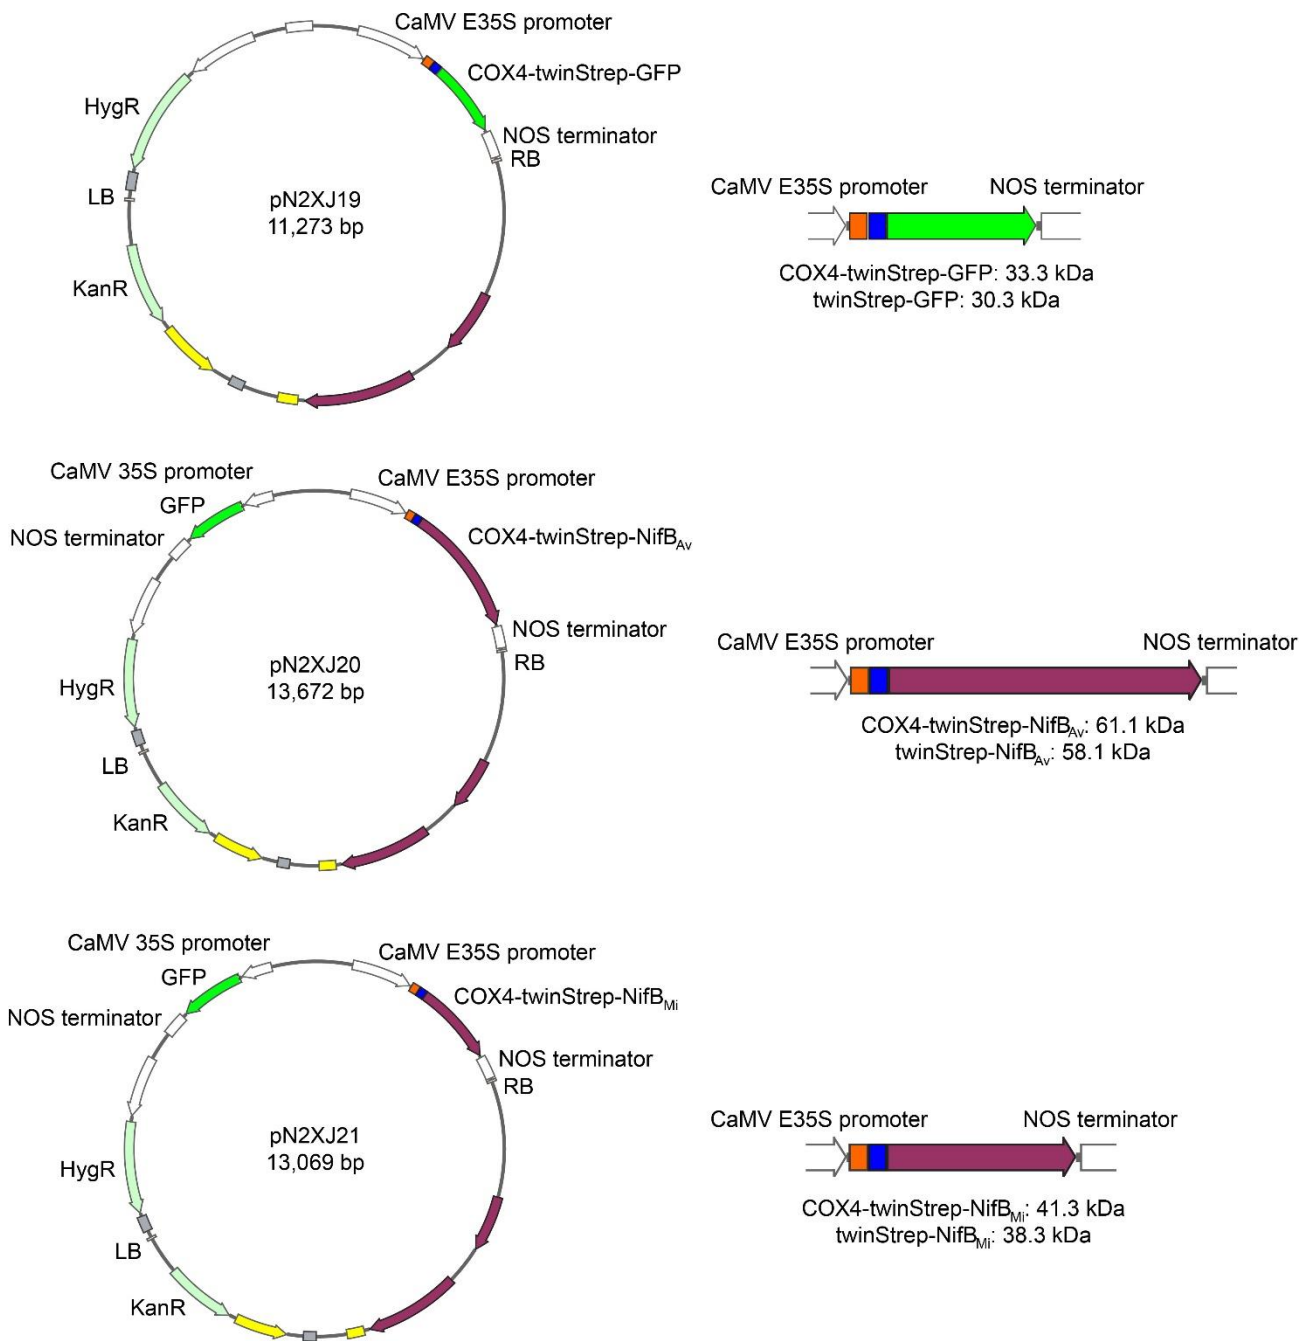

**SUPPLEMENTARY FIGURE 10. Plant expression vectors with COX4 leader sequence.** Schematic overview of plant expression vectors for expression of COX4-twinStrep-GFP, COX4-twinStrep-NifB<sub>Av</sub> and COX4-twinStrep-NifB<sub>Mi</sub>. See Supplementary Figure 8 for detailed information about DNA and protein sequences.
